# Supplementary material for: Anti-Photodamage Effect of Agaricus blazei Murill Polysaccharide on UVB-Damaged HaCaT Cells
Source: MDPI journal article supplement (doi:10.3390/ijms25094676), 2024-04-25
Supplement: s1 [file s1]

Table S1. Primer sequences for Real-Time PCR

| Gene                            | Direction | Primer pair sequence (5'→3') |
|---------------------------------|-----------|------------------------------|
| <i>IL-1<math>\beta</math></i>   | F         | CCTGAGCTCGCCAGTGAAA          |
|                                 | R         | GTGGTGGTCGGAGATTCGTA         |
| <i>IL-8</i>                     | F         | AAGATGTGAAGCTGACGCAGA        |
|                                 | R         | AGAATTGAGCTGAGCCTTGG         |
| <i>IL-6</i>                     | F         | GATGAGTACAAAAGTCCTGATCCA     |
|                                 | R         | CTGCAGCCACTGGTTCTGT          |
| <i>TNF-<math>\alpha</math></i>  | F         | CACAGTGAAGTGCTGGCAAC         |
|                                 | R         | AGGAAGGCCTAAGGTCCACT         |
| <i>JAK1</i>                     | F         | TCTGCATCGAGCGCACAAA          |
|                                 | R         | GTAGGGTTGAGGGACATCTGC        |
| <i>STAT1</i>                    | F         | GTGCACAGAATCCTCCACCA         |
|                                 | R         | ACTGTGCCAGGTACTGTCTG         |
| <i>Caspase-3</i>                | F         | AGGACTCTAGACGGCATCCA         |
|                                 | R         | CAGTGAGACTTGGTGCAGTGA        |
| <i>P21</i>                      | F         | TGCCGAAGTCAGTTCCTTGT         |
|                                 | R         | AGATTCTGGCTGACTGCTCG         |
| <i>SOCS1</i>                    | F         | ACATGGTCCTCTGCGTTCA          |
|                                 | R         | GGAGCGCAGCAGTCTAAAAC         |
| <i><math>\beta</math>-actin</i> | F         | TGGCACCCAGCACAAATGAA         |
|                                 | R         | CTAAGTCATAGCCGCCTAGAAGC      |
